# Supplementary material
Source: publisher site journal article supplement (https://www.spandidos-publications.com/1990/downloadSupplementary)
Supplement: Supplementary file 1 [file downloadSupplementary]

Figure S1. Ribosome-binding protein 1 expression in bladder cancer tissues (T1 and T3b) and para-carcinoma tissues (magnification, x400).

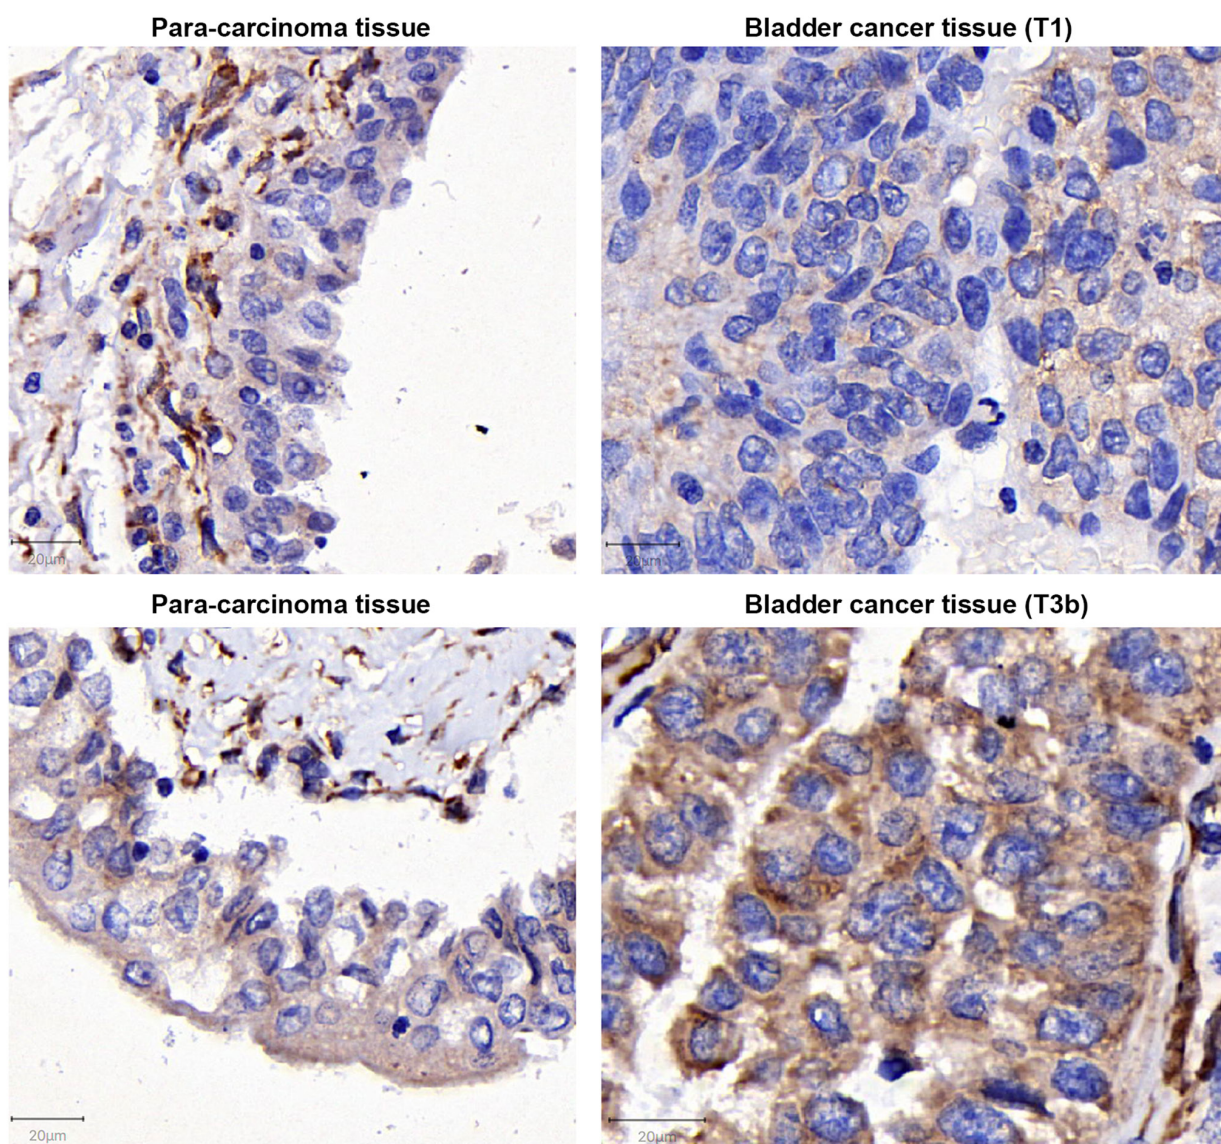

Table SI. Characteristics of patients with bladder cancer.

| Patient | Age | Sex  | TNM     | Surgery | Surgical data | Pathology | IHC score (tumor vs. para-carcinoma) |
|---------|-----|------|---------|---------|---------------|-----------|--------------------------------------|
| 1       | 49  | Male | T4NxM0  | LRC     | May 2020      | TCC       | 8 vs. 12                             |
| 2       | 71  | Male | T2aN0M0 | LRC     | June 2020     | TCC       | 4 vs. 12                             |
| 3       | 70  | Male | T1N0M0  | TURB    | May 2020      | TCC       | 4 vs. 4                              |
| 4       | 82  | Male | T3bN0M0 | LRC     | June 2020     | TCC       | 8 vs. 12                             |

LRC, laparoscopic radical cystectomy; TURB, transurethral resection of bladder tumor; TCC, transitional cell carcinoma; IHC, immunohistochemistry.
